# Supplementary figures and images for: Chondrocyte-specific STAT3 knockout attenuates osteoarthritis progression via inflammation regulation
Source: Research Square preprint supplement (doi:10.21203/rs.3.rs-7812764/v1), 2025-12-01

COL-II


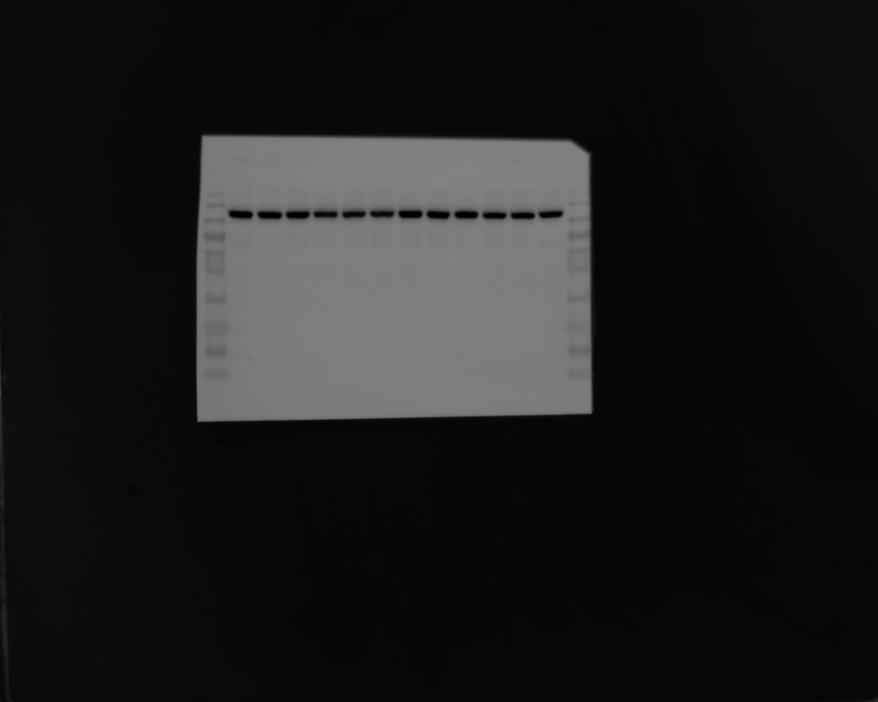


COL-II-GAPDH


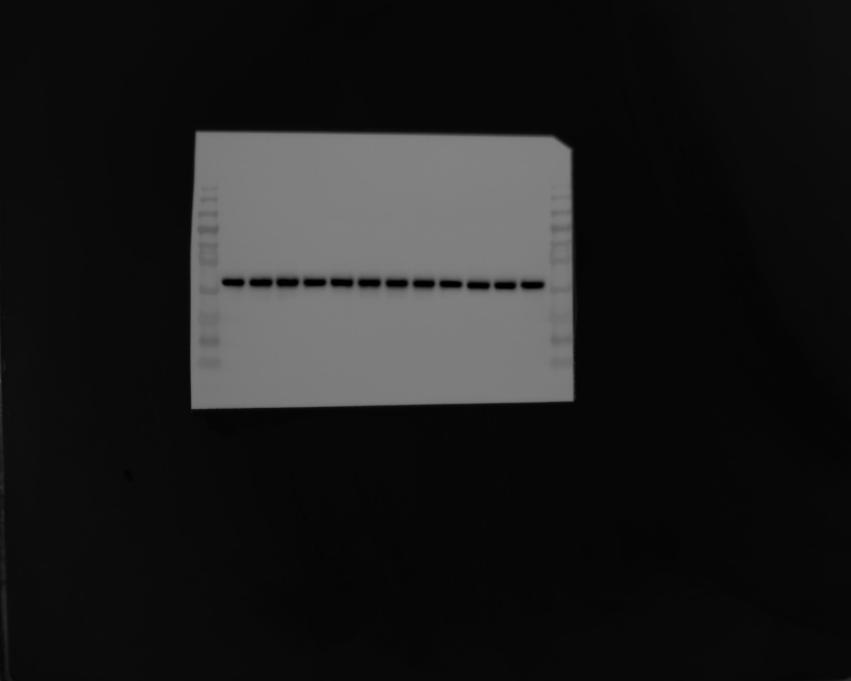


IL-6


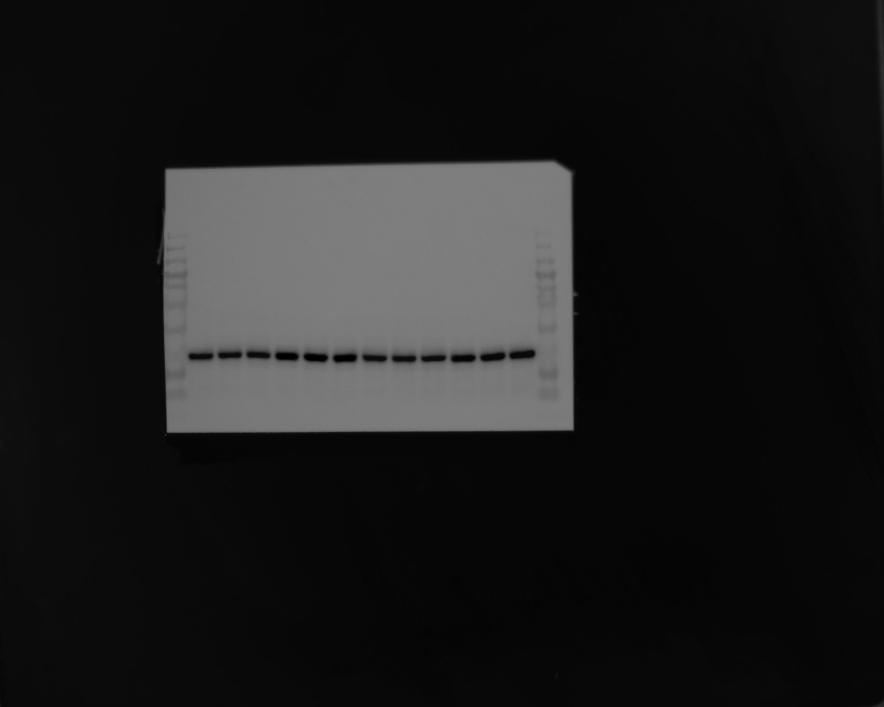


IL-6-GAPDH


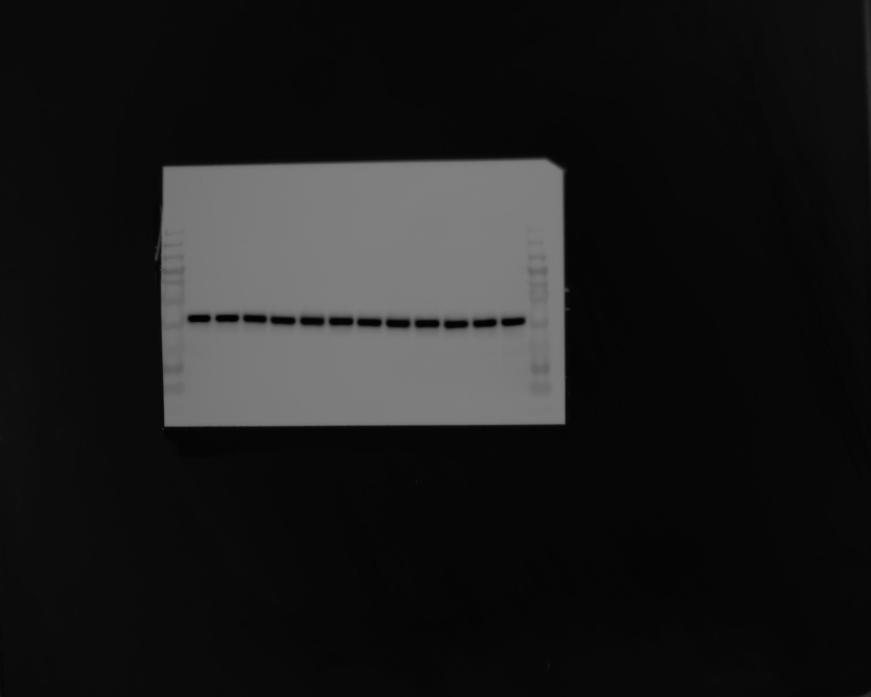


TNF-ɑ


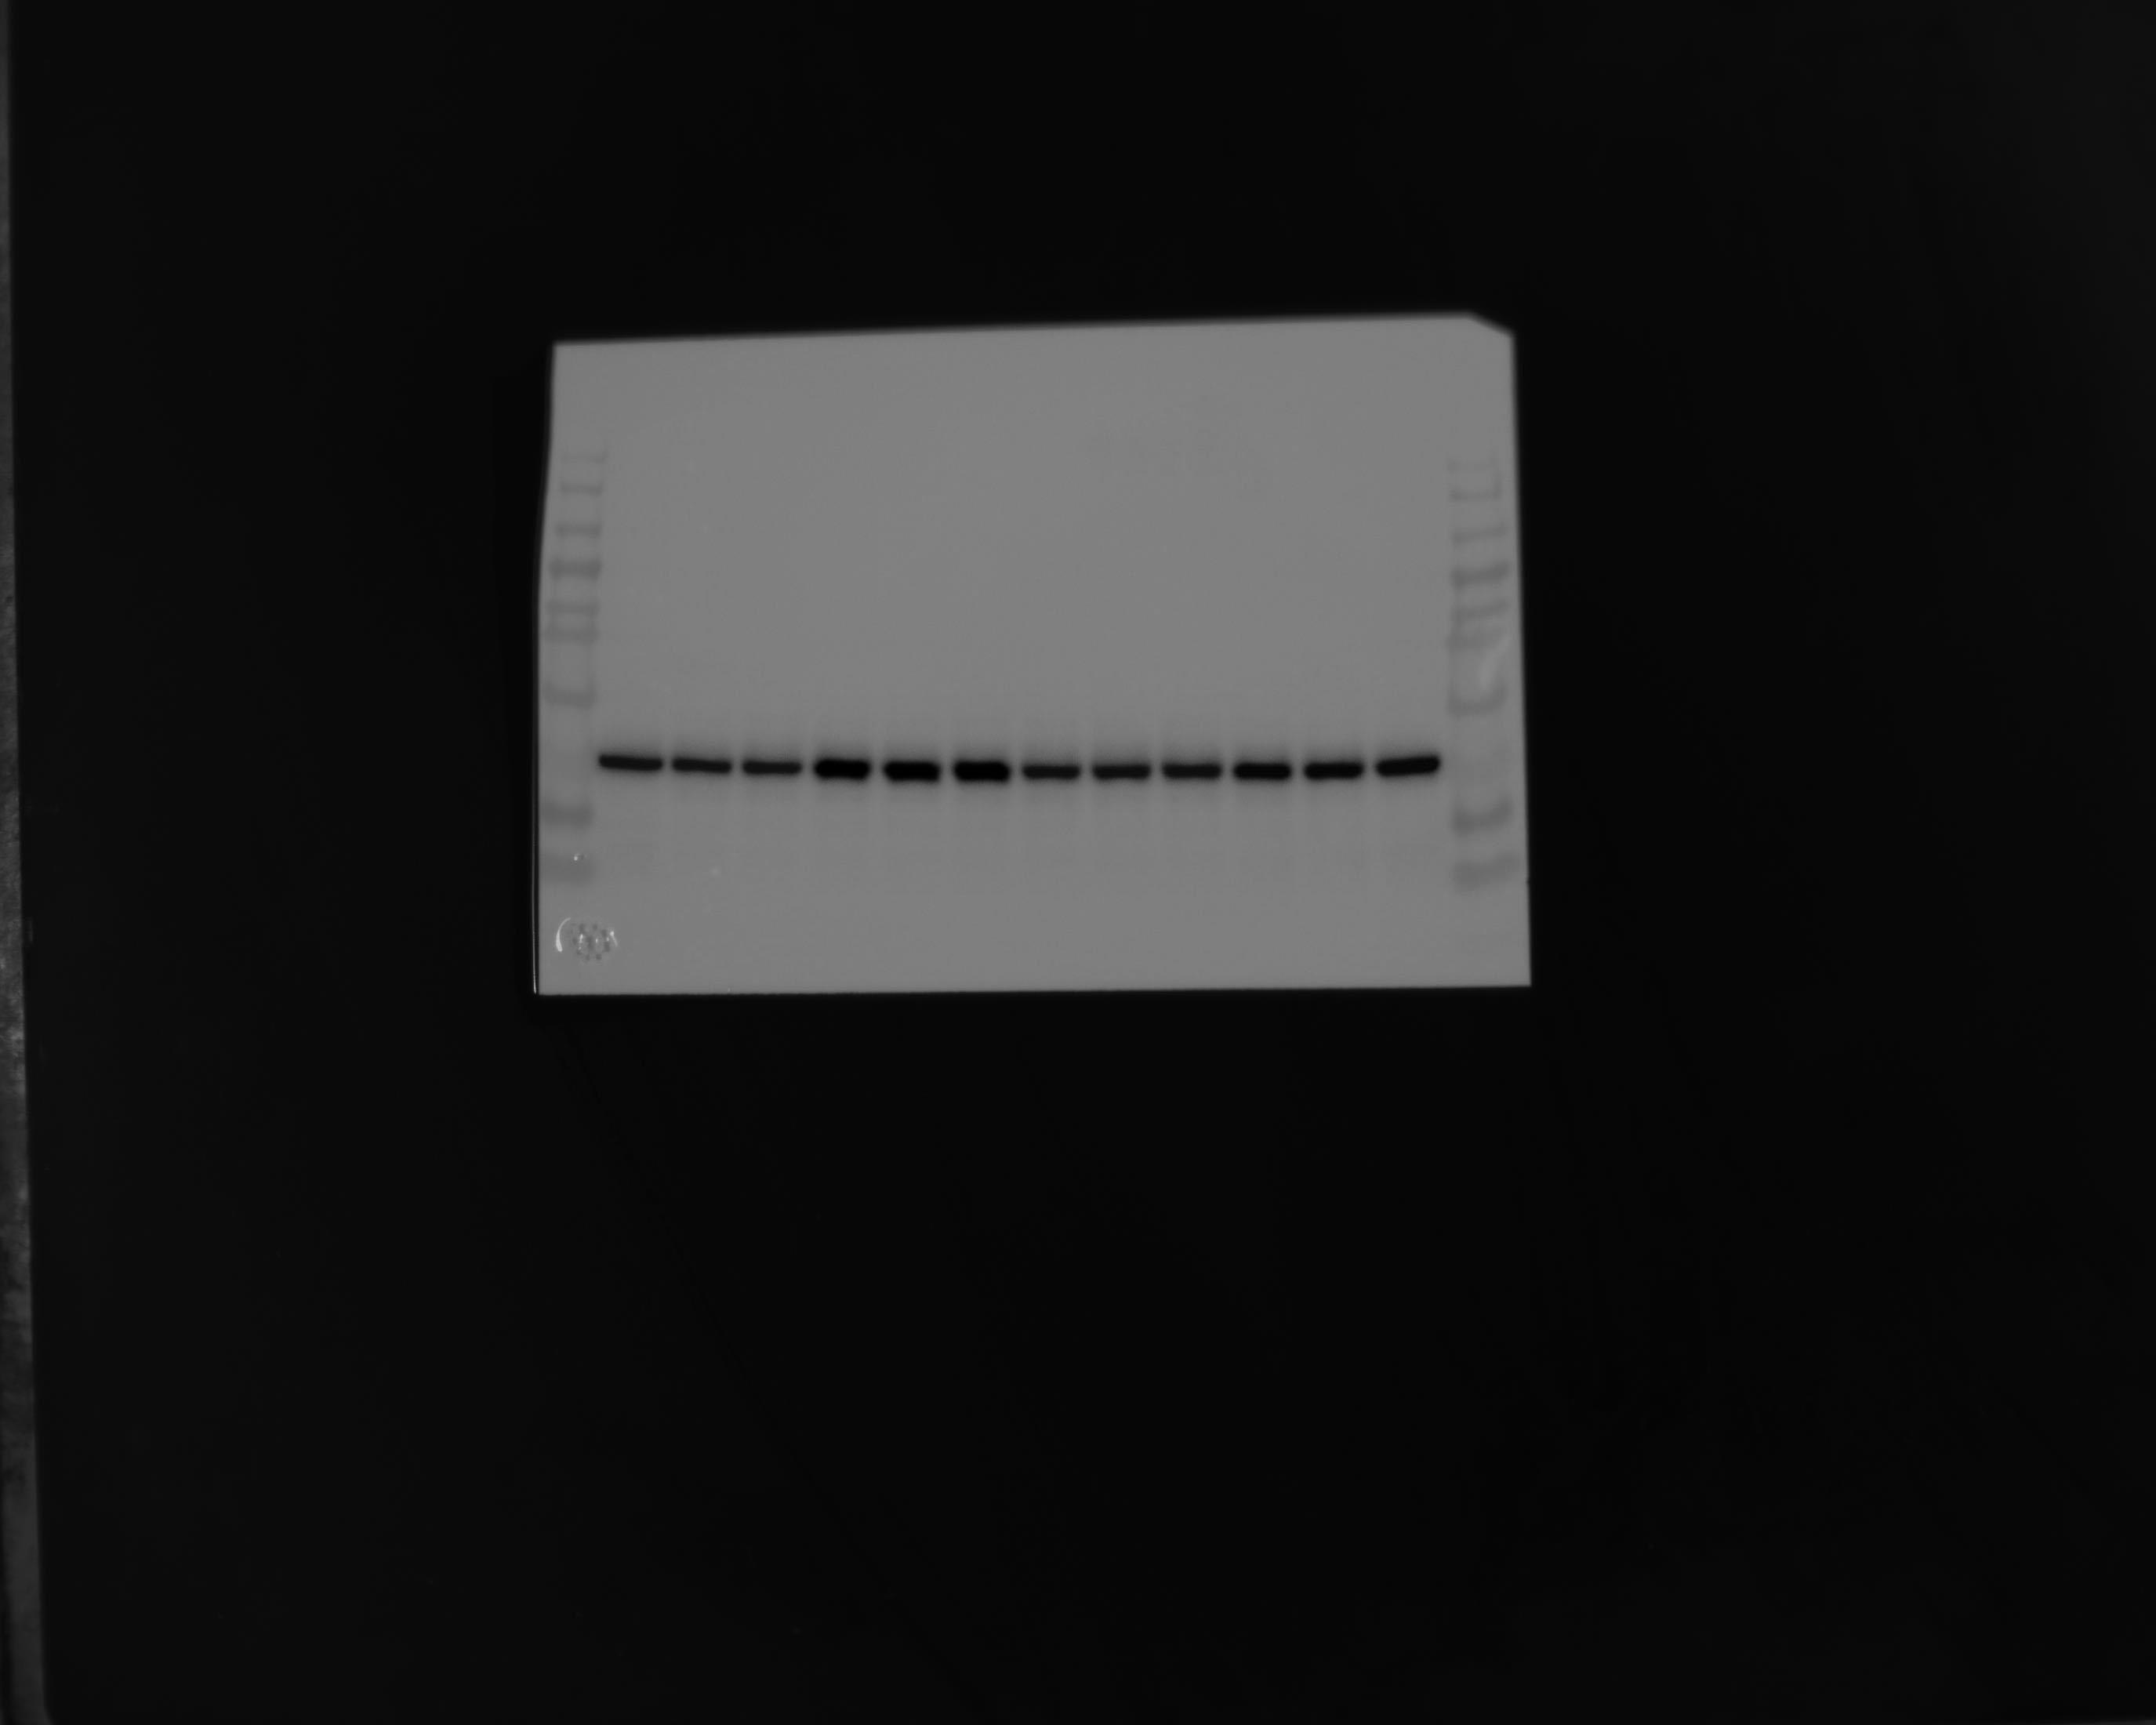


TNF-ɑ-GAPDH


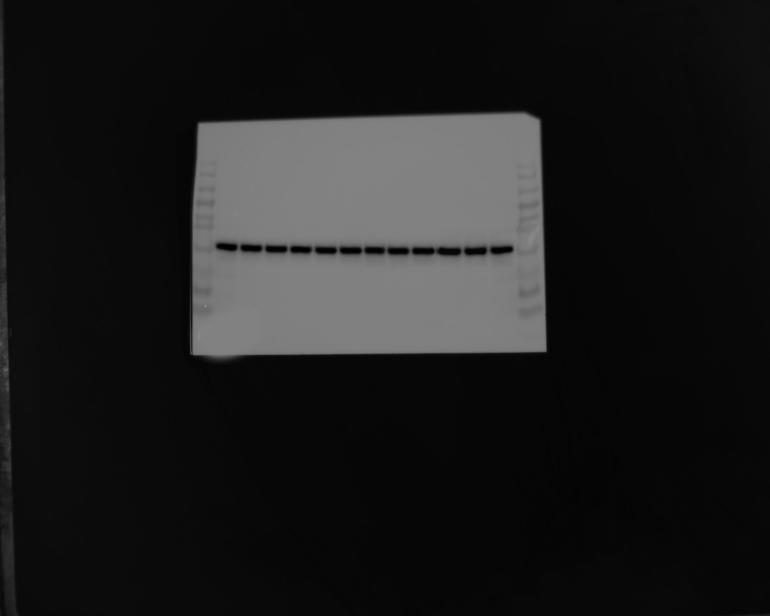


STAT3


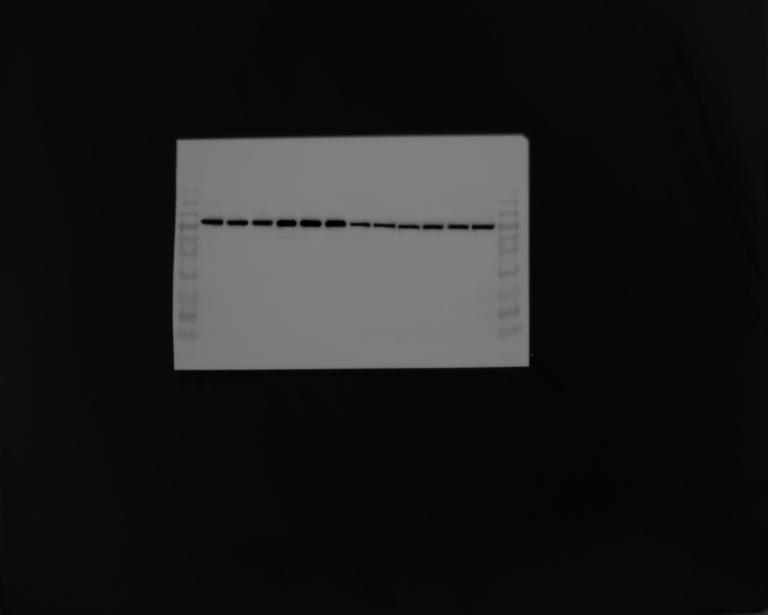


STAT3-GAPDH


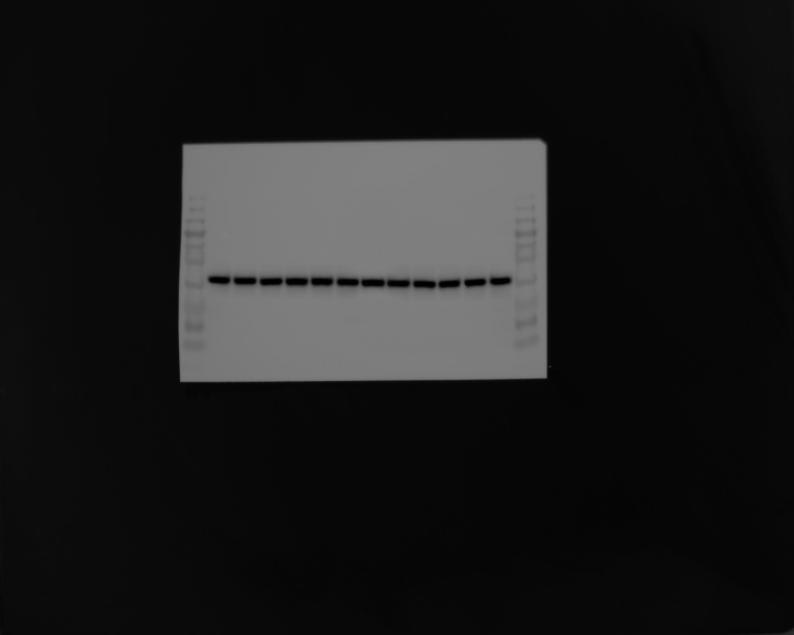


P-STAT3


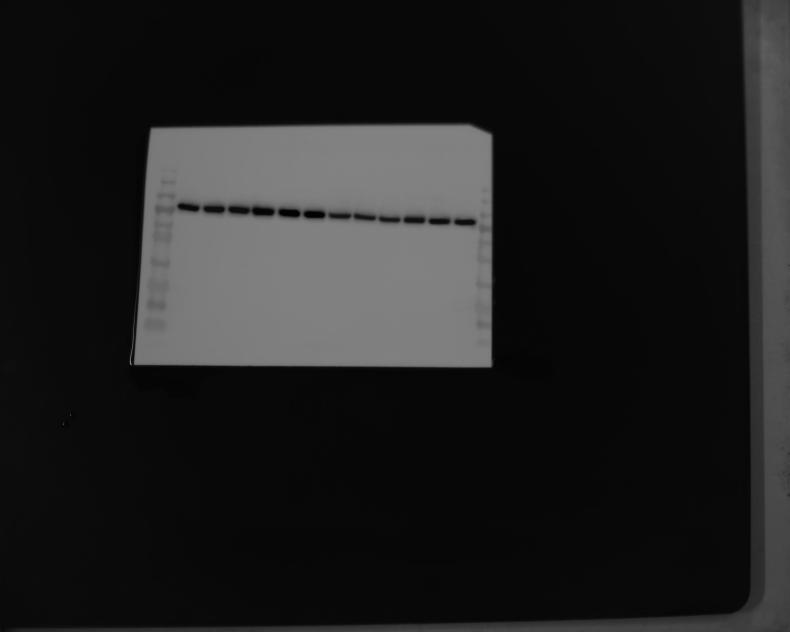


p-STAT3-GAPDH


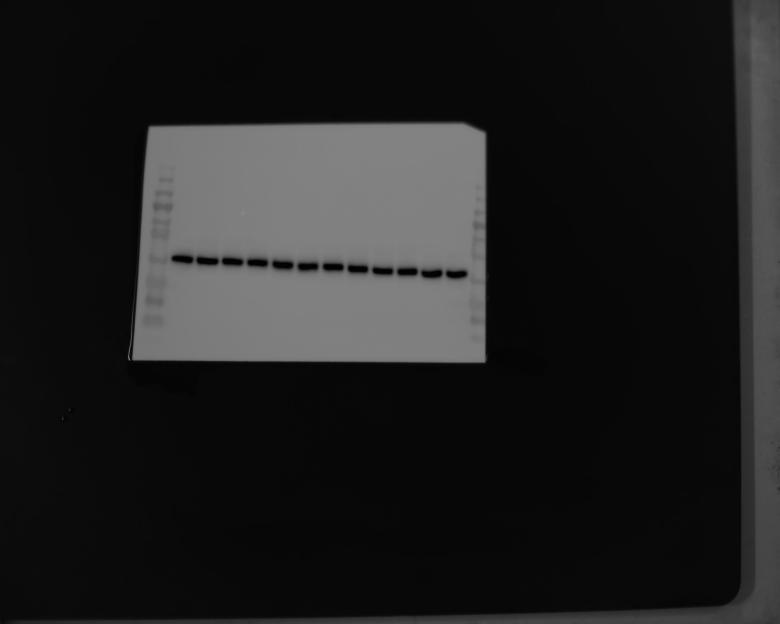

Supplement: Supplementary file 1 [file c19036ca3257160f32681d89.docx]
